# Supplementary material
Source: Springer Nature journal article supplement (https://mijn.bsl.nl/resource/supplementary/13047_2010_123_MOESM2_ESM.pdf/7109926)

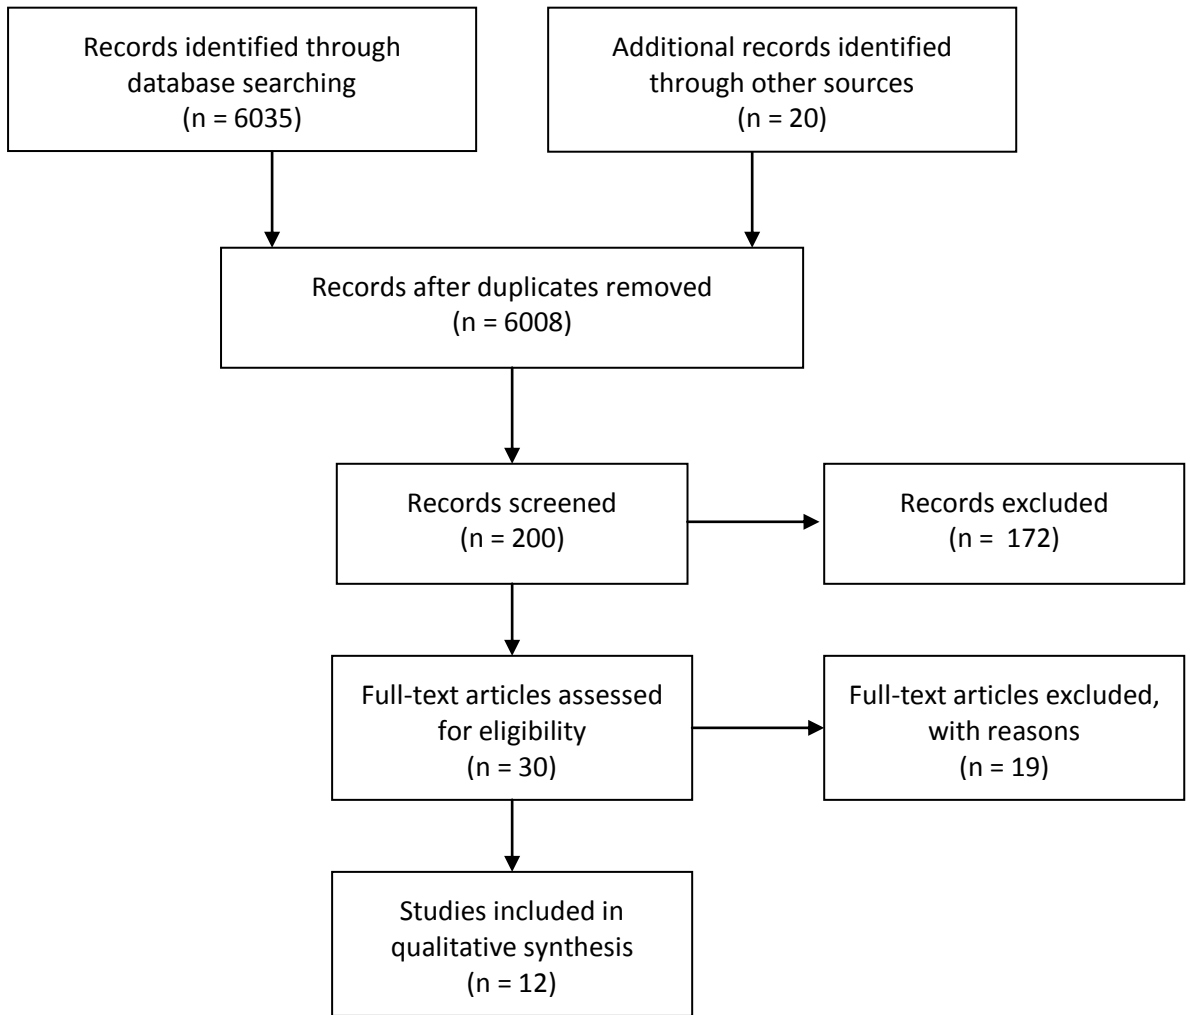

Supplement: MOESM2 [file 7109926]
